# Supplementary material
Source: PubMed Central journal article supplement (PMC7813518)
Supplement: NIHMS1591020-supplement-sup_01.pdf [file NIHMS1591020-supplement-sup_01.pdf]

**Table S1. Pathway analysis of genes bound by FOXO1 exclusively in the absence of a canonical FOXO1 binding motif**

| TermID        | Term                                                                           | Enrichment | logP   | Genes in Term | Target Genes in Term | Fraction of Targets in Term | Total Target Genes | Total Genes | Gene Symbols                                                                                                                      |
|---------------|--------------------------------------------------------------------------------|------------|--------|---------------|----------------------|-----------------------------|--------------------|-------------|-----------------------------------------------------------------------------------------------------------------------------------|
| R-HSA-1442490 | Collagen degradation                                                           | 3.84E-05   | -10.17 | 29            | 7                    | 0.03                        | 228                | 6734        | MMP12, FURIN, MMP14, CTSD, COL25A1, MMP7, COL13A1, FGF2, BMP4, CTSD, ITGA11, COL25A1, MMP7, LAMC1,                                |
| R-HSA-1474244 | Extracellular matrix organization                                              | 1.15E-03   | -6.77  | 219           | 17                   | 0.07                        | 228                | 6734        | FURIN, DDR2, PCOLCE2, PPIB, COL13A1, MMP12, COL6A3, LAMA1, MFAP3, MMP14                                                           |
| R-HSA-1474228 | Degradation of the extracellular matrix                                        | 2.82E-03   | -5.87  | 72            | 8                    | 0.04                        | 228                | 6734        | CTSD, MMP12, COL13A1, LAMC1, FURIN, MMP14, COL25A1, MMP7                                                                          |
| R-HSA-3371453 | Regulation of HSF1-mediated heat shock response                                | 4.69E-03   | -5.36  | 62            | 7                    | 0.03                        | 228                | 6734        | HSPA1B, DNAJB6, YWHAE, HSPA9, HSPA7, NUP35, GSK3B                                                                                 |
| R-HSA-983712  | Ion channel transport                                                          | 8.14E-03   | -4.81  | 122           | 10                   | 0.04                        | 228                | 6734        | TRPM6, ATP7B, SGK1, ATP1A1, ANO6, ATP6V1B2, UBC, ATP9B, TRPV4, ATP11B                                                             |
| R-HSA-4641262 | Disassembly of the destruction complex and recruitment of AXIN to the membrane | 9.25E-03   | -4.68  | 25            | 4                    | 0.02                        | 228                | 6734        | CAV1, FZD5, GSK3B, PPP2R5E                                                                                                        |
| R-HSA-2173793 | Transcriptional activity of SMAD2/SMAD3:SMAD4 heterotrimer                     | 1.31E-02   | -4.34  | 42            | 5                    | 0.02                        | 228                | 6734        | TGIF1, CCNK, UBC, WWTR1, SKI                                                                                                      |
| R-HSA-3371556 | Cellular response to heat stress                                               | 1.71E-02   | -4.07  | 79            | 7                    | 0.03                        | 228                | 6734        | DNAJB6, HSPA1B, HSPA7, HSPA9, YWHAE, GSK3B, NUP35                                                                                 |
| R-HSA-2173796 | SMAD2/SMAD3:SMAD4 heterotrimer regulates transcription                         | 1.76E-02   | -4.04  | 30            | 4                    | 0.02                        | 228                | 6734        | TGIF1, UBC, CCNK, WWTR1                                                                                                           |
| R-HSA-1592389 | Activation of Matrix Metalloproteinases                                        | 1.83E-02   | -4.00  | 17            | 3                    | 0.01                        | 228                | 6734        | MMP14, FURIN, MMP7                                                                                                                |
| R-HSA-425393  | Transport of inorganic cations/anions and amino acids/oligopeptides            | 1.92E-02   | -3.95  | 63            | 6                    | 0.03                        | 228                | 6734        | SLC4A7, SLC5A12, SLC4A2, SLC7A11, SLC43A2, SLC7A6, SLC5A12, SLC4A7, TRPM6, SLC7A11, ANO6, ATP1A1,                                 |
| R-HSA-382551  | Transmembrane transport of small molecules                                     | 2.25E-02   | -3.80  | 437           | 23                   | 0.10                        | 228                | 6734        | SLC39A14, RNASEL, SGK1, NUP35, SLC39A8, ATP11B, DERL1, ATP9B, SLC7A6, SLC29A1, ATP7B, SLC4A2, ADD1, UBC, ATP6V1B2, TRPV4, SLC43A2 |
| R-HSA-933541  | TRAF6 mediated IRF7 activation                                                 | 2.49E-02   | -3.69  | 19            | 3                    | 0.01                        | 228                | 6734        | TRAF6, IFIH1, TANK                                                                                                                |
| R-HSA-170834  | Signaling by TGF-beta Receptor Complex                                         | 2.69E-02   | -3.61  | 68            | 6                    | 0.03                        | 228                | 6734        | SKI, WWTR1, FURIN, CCNK, UBC, TGIF1                                                                                               |
| R-HSA-425381  | Bicarbonate transporters                                                       | 2.79E-02   | -3.58  | 8             | 2                    | 0.01                        | 228                | 6734        | SLC4A2, SLC4A7                                                                                                                    |
| R-HSA-442380  | Zinc influx into cells by the SLC39 gene family                                | 2.79E-02   | -3.58  | 8             | 2                    | 0.01                        | 228                | 6734        | SLC39A8, SLC39A14                                                                                                                 |
| R-HSA-5654726 | Negative regulation of FGFR1 signaling                                         | 2.85E-02   | -3.56  | 20            | 3                    | 0.01                        | 228                | 6734        | SPRY2, FGF2, UBC                                                                                                                  |
| R-HSA-210991  | Basigin interactions                                                           | 2.85E-02   | -3.56  | 20            | 3                    | 0.01                        | 228                | 6734        | SLC7A11, SLC7A6, CAV1                                                                                                             |
| R-HSA-5654733 | Negative regulation of FGFR4 signaling                                         | 3.25E-02   | -3.43  | 21            | 3                    | 0.01                        | 228                | 6734        | SPRY2, UBC, FGF2                                                                                                                  |
| R-HSA-5654732 | Negative regulation of FGFR3 signaling                                         | 3.25E-02   | -3.43  | 21            | 3                    | 0.01                        | 228                | 6734        | UBC, FGF2, SPRY2                                                                                                                  |

**Table S2. Pathway analysis of genes bound by FOXO1 exclusively in the presence of a canonical FOXO1 binding motif**

| TermID        | Term                                                                                           | Enrichment | logP  | Genes in Term | Target Genes in Term | Fraction of Targets in Term | Total Target Genes | Total Genes | Gene Symbols                                                                                                                                                                                                                                                                                                                                                                                                                                                                                                                                                                                                                                                                                                                                                                                                                                                                                                                                                                                                                                                                                                                                                                                                                                                                                                                                                                                                                                                                                                            |
|---------------|------------------------------------------------------------------------------------------------|------------|-------|---------------|----------------------|-----------------------------|--------------------|-------------|-------------------------------------------------------------------------------------------------------------------------------------------------------------------------------------------------------------------------------------------------------------------------------------------------------------------------------------------------------------------------------------------------------------------------------------------------------------------------------------------------------------------------------------------------------------------------------------------------------------------------------------------------------------------------------------------------------------------------------------------------------------------------------------------------------------------------------------------------------------------------------------------------------------------------------------------------------------------------------------------------------------------------------------------------------------------------------------------------------------------------------------------------------------------------------------------------------------------------------------------------------------------------------------------------------------------------------------------------------------------------------------------------------------------------------------------------------------------------------------------------------------------------|
| R-HSA-8848021 | Signaling by PTK6                                                                              | 1.09E-04   | -9.12 | 55            | 17                   | 0.02                        | 787                | 6734        | RASAL2, ARHGAP35, SOCS3, EGFR, SPRED1, PTPN1, KHDRBS3, BCAR1, NRG2, RASA3, RASA2, EPAS1, DOK1, LRRK2, BTC, NR3C1, UBB                                                                                                                                                                                                                                                                                                                                                                                                                                                                                                                                                                                                                                                                                                                                                                                                                                                                                                                                                                                                                                                                                                                                                                                                                                                                                                                                                                                                   |
| R-HSA-162582  | Signal Transduction                                                                            | 1.95E-04   | -8.54 | 1409          | 204                  | 0.26                        | 787                | 6734        | ARHGAP21, TCF7L2, BMP2, DNM3, CYP26B1, AGO2, RGS3, HSPG2, JUNB, ZFYVE9, NR3C1, FUZ, AXIN2, RARG, AKT3, IRS1, EEF2K, PTEN, FMNL2, ADAM10, PDE4B, GLI2, RHOB, PRKCD, CALM2, BIRC3, PTPRJ, WASF2, DUSP4, PPM1A, TRIO, WNT5A, KHDRBS3, TGFBR1, GNA13, BCL2L11, RHOBTB1, CXCR5, IGF1, CAMK2D, ZNRF3, GNG12, ROR1, TAX1BP1, NRP2, ESR1, PTK2, ADCY1, NCAM1, CDC42EP3, MDM2, PHLPP1, DGKI, PDE4D, ANGPT1, REEP5, BRAP, HNRNP, CDK1, FGFBP3, RASA2, MYC, CENPP, LRRK2, DOK1, CAB39, RTN4, INSR, PRR5, RHEB, MYLK, WWOX, BDKRB2, SMAD7, E2F3, PDE1A, TSC1, BUB3, NRG2, DUSP10, BCAR1, BTC, INCENP, MYH9, RAF1, PTCH1, AMOTL1, EPAS1, RHOU, PAG1, MST1R, BMP1R1A, MAPKAP1, ARHGDI, PTPN1, SAV1, FLRT2, CTNNB1, AGTR1, STK11, RASAL2, HSP90AA1, ITGB3, ARHGAP26, ATP2A2, AKAP9, GRK6, INHBB, RHOT1, AP2A1, LRIG1, ARHGAP1, UBB, CDC14B, RPS6KA5, ARHGAP17, NCK1, MKL1, ALDH1A3, UBE2D3, LRP1, ARHGEF12, REEP3, NF2, NEDD4L, FAM13A, GRB10, DHRS3, PREX1, ARHGAP12, ANXA1, RAPGEF1, ARHGAP35, NDE1, KAT2B, NFKB1, RSP03, ABCA4, HDAC7, WIPF1, NTRK2, RICTOR, JAK1, THBS1, PPP3CC, PTGER2, STRAP, ROR2, NR4A1, DUSP6, ARHGEF37, PLB1, PIK3R1, ARRB1, FLT1, PSME4, SPRED1, LDLR, DAAMI, YWHAQ, SOCS3, PSMD9, RGS10, OTUD7B, VAV3, TLE1, RALGDS, PIK3CD, ARHGAP24, CDC14A, JUP, PPP1R12A, ABR, IGF1R, GFRA2, MAPKAPK2, RASA3, PDGFC, WWP1, PPP1R12B, ATP6V1C2, STAT1, APP, HIST1H2AC, EGFR, ARHGEF10, BCR, CILP, RALBP1, PLA2G4A, FOXO1, PDE8A, NGF, NFATC1, SQSTM1, PPP1R15A, ARHGEF3, PKN2, PDHB, GNA12, HDAC9, IL6ST, TRIM33, ADRB2 |
| R-HSA-909733  | Interferon alpha/beta signaling                                                                | 1.41E-03   | -6.57 | 45            | 13                   | 0.02                        | 787                | 6734        | IRF1, JAK1, PTPN1, IFIT2, ISG20, IFIT1, STAT1, GBP2, HLA-C, ADAR, XAF1, IRF4, SOCS3                                                                                                                                                                                                                                                                                                                                                                                                                                                                                                                                                                                                                                                                                                                                                                                                                                                                                                                                                                                                                                                                                                                                                                                                                                                                                                                                                                                                                                     |
| R-HSA-5218920 | VEGFR2 mediated vascular permeability                                                          | 1.92E-03   | -6.26 | 26            | 9                    | 0.01                        | 787                | 6734        | HSP90AA1, VAV3, CALM2, PRR5, JUP, AKT3, CTNNB1, RICTOR, MAPKAP1                                                                                                                                                                                                                                                                                                                                                                                                                                                                                                                                                                                                                                                                                                                                                                                                                                                                                                                                                                                                                                                                                                                                                                                                                                                                                                                                                                                                                                                         |
| R-HSA-6785807 | Interleukin-4 and 13 signaling                                                                 | 2.02E-03   | -6.20 | 75            | 18                   | 0.02                        | 787                | 6734        | IRF4, SOCS3, HSP90AA1, FOS, FOXO1, RORC, RHOU, STAT1, VCAM1, ANXA1, PIK3R1, JUNB, MYC, F13A1, COL1A2, JAK1, RORA, CD36                                                                                                                                                                                                                                                                                                                                                                                                                                                                                                                                                                                                                                                                                                                                                                                                                                                                                                                                                                                                                                                                                                                                                                                                                                                                                                                                                                                                  |
| R-HSA-194840  | Rho GTPase cycle                                                                               | 2.14E-03   | -6.15 | 112           | 24                   | 0.03                        | 787                | 6734        | RHOT1, ARHGAP24, ARHGAP21, ABR, ARHGAP1, ARHGAP17, TRIO, ARHGEF12, GNA13, ARHGEF37, RHOBTB1, ARHGEF3, FAM13A, RHOU, PREX1, ARHGAP12, ARHGEF10, ARHGDI, BCR, VAV3, RALBP1, ARHGAP35, RHOB, ARHGAP26, BCL2L11, ARHGEF3, BTC, ARHGEF37, GNA13, RAF1, PIK3R1, SQSTM1, DUSP10, NR4A1, DUSP6, NRG2, TRIO, NGF, RICTOR, PDE1A, DUSP4, JAK1, NTRK2, PHLPP1, AKAP9, RALGDS, PIK3CD, MDM2, ITGB3, NCAM1, RASAL2, VAV3, ADCY1, PSMD9, MAPKAP1, SPRED1, PSME4, PTK2, CAMK2D, ARRB1, RASA2, BRAP, ARHGEF12, AGO2, MAPKAPK2, RASA3, GFRA2, DNM3, ANGPT1, UBB, RPS6KA5, ABR, AP2A1, FOXO1, CALM2, NFKB1, PRR5, PRKCD, RAPGEF1, PTEN, INSR, ARHGEF10, IRS1, PREX1, EGFR, AKT3, RTN4                                                                                                                                                                                                                                                                                                                                                                                                                                                                                                                                                                                                                                                                                                                                                                                                                                                     |
| R-HSA-166520  | Signalling by NGF                                                                              | 2.33E-03   | -6.06 | 381           | 63                   | 0.08                        | 787                | 6734        | COL5A2, NTN4, BMP2, COL19A1, HTRA1, COL1A2, MUSK, CD47, ITGB5, HSPG2, TNC, LOXL4, VCAM1, COL11A1, PLOD2, COL3A1, ADAM10, TNXB, MMP16, DCN, ACAN, PSEN1, THBS1, ADAMTS3, COL12A1, ITGB4, ASPN, TIMP2, CAST, CAPN2, DST, P4HA3, SPARC, ITGA5, COL15A1, COL2A1, EFEMP1, ITGB3, NCAM1                                                                                                                                                                                                                                                                                                                                                                                                                                                                                                                                                                                                                                                                                                                                                                                                                                                                                                                                                                                                                                                                                                                                                                                                                                       |
| R-HSA-1474244 | Extracellular matrix organization                                                              | 4.36E-03   | -5.43 | 219           | 39                   | 0.05                        | 787                | 6734        | CTNNB1, MYC, AXIN2, TCF7L2                                                                                                                                                                                                                                                                                                                                                                                                                                                                                                                                                                                                                                                                                                                                                                                                                                                                                                                                                                                                                                                                                                                                                                                                                                                                                                                                                                                                                                                                                              |
| R-HSA-4411364 | Binding of TCF/LEF:CTNNB1 to target gene promoters                                             | 4.84E-03   | -5.33 | 7             | 4                    | 0.01                        | 787                | 6734        | SPARC, ITGA5, COL15A1, COL2A1, EFEMP1, ITGB3, NCAM1                                                                                                                                                                                                                                                                                                                                                                                                                                                                                                                                                                                                                                                                                                                                                                                                                                                                                                                                                                                                                                                                                                                                                                                                                                                                                                                                                                                                                                                                     |
| R-HSA-74713   | IRS activation                                                                                 | 5.81E-03   | -5.15 | 4             | 3                    | 0.00                        | 787                | 6734        | CTNNB1, MYC, AXIN2, TCF7L2                                                                                                                                                                                                                                                                                                                                                                                                                                                                                                                                                                                                                                                                                                                                                                                                                                                                                                                                                                                                                                                                                                                                                                                                                                                                                                                                                                                                                                                                                              |
| R-HSA-1483257 | Phospholipid metabolism                                                                        | 6.51E-03   | -5.03 | 155           | 29                   | 0.04                        | 787                | 6734        | INSR, IRS1, GRB10                                                                                                                                                                                                                                                                                                                                                                                                                                                                                                                                                                                                                                                                                                                                                                                                                                                                                                                                                                                                                                                                                                                                                                                                                                                                                                                                                                                                                                                                                                       |
| R-HSA-186763  | Downstream signal transduction                                                                 | 6.56E-03   | -5.03 | 274           | 46                   | 0.06                        | 787                | 6734        | PTK2, PSME4, SPRED1, MAPKAP1, ARRB1, CAMK2D, NCAM1, MDM2, ITGB3, PIK3CD, AKAP9, PHLPP1, PSMD9, ADCY1, RASAL2, JAK1, PDE1A, DUSP4, RICTOR, PIK3R1, RAF1, BTC, NRG2, DUSP6, BCAR1, NR4A1, DUSP10, DUSP3, IRS1, EGFR, STAT1, PRKCD, PRR5, CALM2, FOXO1, PTEN, RAPGEF1, NCK1, ANGPT1, UBB, GFRA2, RASA2, RASA3, AGO2, BRAP, AKT3, EGFR, IRS1, INSR, PTEN, RAPGEF1, PRKCD, PRR5, CALM2, FOXO1, AP2A1, RPS6KA5, UBB, ANGPT1, DNM3, GFRA2, RASA3, MAPKAPK2, AGO2, BRAP, RASA2, ARRB1, CAMK2D, PTK2, PSME4, SPRED1, MAPKAP1, PSMD9, ADCY1, RASAL2, ITGB3, NCAM1, MDM2, PIK3CD, RALGDS, PHLPP1, AKAP9, NTRK2, PDE1A, JAK1, DUSP4, RICTOR, NGF, NRG2, DUSP6, NR4A1, DUSP10, RAF1, PIK3R1, BTC                                                                                                                                                                                                                                                                                                                                                                                                                                                                                                                                                                                                                                                                                                                                                                                                                                     |
| R-HSA-187037  | NGF signalling via TRKA from the plasma membrane                                               | 7.07E-03   | -4.95 | 304           | 50                   | 0.06                        | 787                | 6734        | TRIM25, SOCS3, IRF4, HLA-C, TRIM8, NCAM1, PRKCD, STAT1, CAMK2D, PML, GBP2, IRF1, JAK1, VCAM1, PTPN1                                                                                                                                                                                                                                                                                                                                                                                                                                                                                                                                                                                                                                                                                                                                                                                                                                                                                                                                                                                                                                                                                                                                                                                                                                                                                                                                                                                                                     |
| R-HSA-877300  | Interferon gamma signaling                                                                     | 7.93E-03   | -4.84 | 66            | 15                   | 0.02                        | 787                | 6734        | HSP90AB1, TXNIP, APP, P2RX7, NLRP1                                                                                                                                                                                                                                                                                                                                                                                                                                                                                                                                                                                                                                                                                                                                                                                                                                                                                                                                                                                                                                                                                                                                                                                                                                                                                                                                                                                                                                                                                      |
| R-HSA-622312  | Inflammasomes                                                                                  | 8.43E-03   | -4.78 | 12            | 5                    | 0.01                        | 787                | 6734        | STAG2, RAD21, PDS5B, STAG1                                                                                                                                                                                                                                                                                                                                                                                                                                                                                                                                                                                                                                                                                                                                                                                                                                                                                                                                                                                                                                                                                                                                                                                                                                                                                                                                                                                                                                                                                              |
| R-HSA-2468052 | Establishment of Sister Chromatid Cohesion                                                     | 8.80E-03   | -4.73 | 8             | 4                    | 0.01                        | 787                | 6734        | ZRANB1, TNIP1, NOD1, ESR1, YOD1, UBB, PTEN, OTUD7B, TRIM25                                                                                                                                                                                                                                                                                                                                                                                                                                                                                                                                                                                                                                                                                                                                                                                                                                                                                                                                                                                                                                                                                                                                                                                                                                                                                                                                                                                                                                                              |
| R-HSA-5689896 | Ovarian tumor domain proteases                                                                 | 9.05E-03   | -4.70 | 32            | 9                    | 0.01                        | 787                | 6734        | EGFR, ARRB1, LDLR, STON2, SCARB2, AGTR1, ADRB2, DAB2, FCHO2, LDLRAP1, AP2A1, TOR1A, SLC2A8, UBB, SGIP1, WNT5A, PICALM                                                                                                                                                                                                                                                                                                                                                                                                                                                                                                                                                                                                                                                                                                                                                                                                                                                                                                                                                                                                                                                                                                                                                                                                                                                                                                                                                                                                   |
| R-HSA-8856825 | Cargo recognition for clathrin-mediated endocytosis                                            | 9.82E-03   | -4.62 | 80            | 17                   | 0.02                        | 787                | 6734        | RASA3, AGO2, BRAP, PDGFC, RASA2, NCK1, UBB, ANGPT1, GFRA2, PTEN, RAPGEF1, PRKCD, PRR5, CALM2, FOXO1, AKT3, IRS1, EGFR, STAT1, INSR, NRG2, DUSP6, BCAR1, DUSP10, NR4A1, RAF1, PIK3R1, BTC, THBS1, DUSP4, JAK1, PDE1A, RICTOR, PSMD9, ADCY1, RASAL2, NCAM1, MDM2, ITGB3, PIK3CD, AKAP9, PHLPP1, ARRB1, CAMK2D, PTK2, PSME4, SPRED1, MAPKAP1                                                                                                                                                                                                                                                                                                                                                                                                                                                                                                                                                                                                                                                                                                                                                                                                                                                                                                                                                                                                                                                                                                                                                                               |
| R-HSA-186797  | Signaling by PDGF                                                                              | 1.00E-02   | -4.60 | 295           | 48                   | 0.06                        | 787                | 6734        | NPAS2, CARM1, SREBF1, ABCB4, ARNT, ARNTL, MED15, SLC27A1, NR1D1, SIN3A, MED25, MED28, RORA, CD36, THRAP3, RGL1, FADS1, MED9, FODT1, MED30, MED26                                                                                                                                                                                                                                                                                                                                                                                                                                                                                                                                                                                                                                                                                                                                                                                                                                                                                                                                                                                                                                                                                                                                                                                                                                                                                                                                                                        |
| R-HSA-400206  | Regulation of lipid metabolism by Peroxisome proliferator-activated receptor alpha (PPARalpha) | 1.12E-02   | -4.49 | 107           | 21                   | 0.03                        | 787                | 6734        |                                                                                                                                                                                                                                                                                                                                                                                                                                                                                                                                                                                                                                                                                                                                                                                                                                                                                                                                                                                                                                                                                                                                                                                                                                                                                                                                                                                                                                                                                                                         |

**Table S3. Pathway analysis of genes bound by FOXO1 exclusively at enhancer regions**

| TermID        | Term                                                          | Enrichment | logP   | Genes in Term | Target Genes in Term | Fraction of Targets in Term | Total Target Genes | Total Genes | Gene Symbols                                                                                                                                                                                                                                                                                                                                                                                                                                                                                                                                                                                                                                                                                                                                                                                                                                                                                                                                                                                                                                                                                                                                                                    |
|---------------|---------------------------------------------------------------|------------|--------|---------------|----------------------|-----------------------------|--------------------|-------------|---------------------------------------------------------------------------------------------------------------------------------------------------------------------------------------------------------------------------------------------------------------------------------------------------------------------------------------------------------------------------------------------------------------------------------------------------------------------------------------------------------------------------------------------------------------------------------------------------------------------------------------------------------------------------------------------------------------------------------------------------------------------------------------------------------------------------------------------------------------------------------------------------------------------------------------------------------------------------------------------------------------------------------------------------------------------------------------------------------------------------------------------------------------------------------|
| R-HSA-1474244 | Extracellular matrix organization                             | 5.38E-09   | -19.04 | 219           | 53                   | 0.07                        | 721                | 6734        | VCAM1,NTN4,TIMP2,COL5A2,HSPG2,MMP7,CAST,ITGB4,COL6A3,P4HA3,MMP14,LAMA1,LTBP2,SPARC,THBS1,LTBP1,HAPLN1,COL13A1,ITGA11,ADAMTS5,FGF2,TNC,COL15A1,COL11A1,COL2E2,ADAMTS9,NCAM1,COL2A1,COL25A1,HTRA1,FU,FIN,DDR2,ITGA5,VCAN,ITGB5,MMP16,DS1,ADAM10,TNXB,MUSK,ITGB3,BMP4,ITGB1,ACAN,COL19A1,MFAP3,MMP12,ADAMTS3,LUM,FBLN1,PP1B,PSEN1,ASPN                                                                                                                                                                                                                                                                                                                                                                                                                                                                                                                                                                                                                                                                                                                                                                                                                                             |
| R-HSA-3000178 | ECM proteoglycans                                             | 2.09E-04   | -8.48  | 46            | 14                   | 0.02                        | 721                | 6734        | ITGB3,HAPLN1,ITGB1,TNC,NCAM1,ACAN,ASPN,LAMA1,VCAN,ITGB5,LUM,SPARC,MUSK,TNXB                                                                                                                                                                                                                                                                                                                                                                                                                                                                                                                                                                                                                                                                                                                                                                                                                                                                                                                                                                                                                                                                                                     |
| R-HSA-1474228 | Degradation of the extracellular matrix                       | 4.31E-04   | -7.75  | 72            | 18                   | 0.02                        | 721                | 6734        | CAST,MMP7,MMP12,COL19A1,ACAN,TIMP2,ADAM10,MMP16,HSPG2,COL15A1,COL13A1,ADAMTS5,FURIN,PSEN1,ADAMTS9,HTRA1,COL25A1,MMP14                                                                                                                                                                                                                                                                                                                                                                                                                                                                                                                                                                                                                                                                                                                                                                                                                                                                                                                                                                                                                                                           |
| R-HSA-1368108 | BMAL1:CLOCK,NPAS2 activates circadian gene expression         | 1.38E-03   | -6.59  | 43            | 12                   | 0.02                        | 721                | 6734        | PPARGC1A,CHD9,BHLHE40,RXRA,KLF15,NPAS2,NR1P1,BHLHE41,PER1,NR1D1,NR3C1,ARNTL                                                                                                                                                                                                                                                                                                                                                                                                                                                                                                                                                                                                                                                                                                                                                                                                                                                                                                                                                                                                                                                                                                     |
| R-HSA-190377  | FGFR2b ligand binding and activation                          | 1.64E-03   | -6.41  | 6             | 4                    | 0.01                        | 721                | 6734        | FGF2,FGF1,FGFR2,FGFBP3                                                                                                                                                                                                                                                                                                                                                                                                                                                                                                                                                                                                                                                                                                                                                                                                                                                                                                                                                                                                                                                                                                                                                          |
| R-HSA-162582  | Signal Transduction                                           | 1.77E-03   | -6.34  | 1409          | 182                  | 0.25                        | 721                | 6734        | PTPN1,PIK3CB,ABL1,PDE8A,RARG,TNFRSF1A,ARHGAP42,CCL28,WVTR1,AKR1C1,JAK1,PPP1R15A,GNAQ,PPP3CC,BCAR1,INTU,PDGFC,PDHB,NTRK2,NET1,DGKI,RHOBTB1,YWHAQ,PTGER2,PPP2R5E,PSMD9,FZD5,CD55,NEDD4L,PPP1R12A,PA,G1,DNM3,ROR2,GRB10,PRKAB2,NFKB1,TRIO,TRIM33,MYLK,ARRB1,ARHGAP22,L,RIG1,SOCS3,ABCA4,CYP26B1,RHO,FAST1,AKT3,RICTOR,PRKCD,PDGFRA,ARHGAP12,PLA2G4A,CTNNB1,RXRA,ITGB3,WIPF1,RALGDS,MYH9,ROR1,RTN4,ADAM10,SPRED1,CAMK2D,AGTR1,RGS3,FURIN,RASAL2,KHDRBS3,TCF7L2,ANXA1,BDKRB2,FGF2,SMAD7,CDC14A,THBS1,CDH5,BCR,RASA3,LAMA1,GRIN2A,CDKN2B,CCNK,FGF1,SMAD6,MAPKAP1,RHOB,NRP2,TAX1BP1,HNRNP1,RBFOX2,CDC14B,ARHGDI1,EPAS1,GLI2,STRAP,INHBA,EEF2K,NR3C1,ARHGAP17,ADRB2,MEF2C,INCEP,TLE3,HDAC7,DUSP10,RAPGEF1,ARHGEF10,NCAM1,CAB39,FGFR2,PLB1,STAT1,TIAM2,AMOTL1,ZNRF3,IL6ST,ANGPT1,CAV1,VAV3,WNT5A,WWOX,GFRA2,COL6A3,ATP6V1B2,ZFYVE9,NR4A1,RSPO3,HSPG2,TRAF6,NGG12,SAV1,RHEB,NDEL1,ARHGEF3,RAPGEF2,RGS1,GPC6,ATP2A2,TGIF1,FGFBP3,AXIN2,DOK1,STARD13,SQSTM1,TGFBF1,GNA12,UBB,E2F3,RAP1B,TNRC6B,CDC42EP3,DIAPH1,ALDH1A3,NFATC1,JUP,MST1R,ITGB1,SOX6,PDE4B,NOTCH2,IGF1,ARHGEF12,EGFR,PKN2,PTEN,ATP6V1C2,FLT1,ARHGAP35,ABR,DLCL1,IRS1,AGO2,CENPP,RAF1,CDON,SPLOL,RARB,GAS1,WWP1,DAAM1,MAPKAPK2 |
| R-HSA-3000171 | Non-integrin membrane-ECM interactions                        | 1.97E-03   | -6.23  | 39            | 11                   | 0.02                        | 721                | 6734        | ITGB4,ITGB1,FGF2,TNC,ITGB3,NTN4,ITGB5,LAMA1,DDR2,THBS1,HSPG2                                                                                                                                                                                                                                                                                                                                                                                                                                                                                                                                                                                                                                                                                                                                                                                                                                                                                                                                                                                                                                                                                                                    |
| R-HSA-983712  | Ion channel transport                                         | 2.19E-03   | -6.12  | 122           | 24                   | 0.03                        | 721                | 6734        | UBB,NEDD4L,STOM,ATP7B,ATP8B1,ANO6,ATP11B,SCN11A,ATP2B4,MCOLN2,TRPM6,CAMK2D,ANO1,TPCN1,ATP9A,ATP6V1C2,ATP2A2,TRPV4,RAF1,ATPB84,TTYH3,ATP6V1B2,ATP1A1,WWP1                                                                                                                                                                                                                                                                                                                                                                                                                                                                                                                                                                                                                                                                                                                                                                                                                                                                                                                                                                                                                        |
| R-HSA-1442490 | Collagen degradation                                          | 2.44E-03   | -6.02  | 29            | 9                    | 0.01                        | 721                | 6734        | ADAM10,MMP14,FURIN,MMP12,COL19A1,COL25A1,COL15A1,COL13A1,MMP7                                                                                                                                                                                                                                                                                                                                                                                                                                                                                                                                                                                                                                                                                                                                                                                                                                                                                                                                                                                                                                                                                                                   |
| R-HSA-3000170 | Syndecan interactions                                         | 2.49E-03   | -6.00  | 19            | 7                    | 0.01                        | 721                | 6734        | ITGB3,ITGB5,TNC,ITGB4,FGF2,ITGB1,THBS1                                                                                                                                                                                                                                                                                                                                                                                                                                                                                                                                                                                                                                                                                                                                                                                                                                                                                                                                                                                                                                                                                                                                          |
| R-HSA-1566948 | Elastic fibre formation                                       | 2.82E-03   | -5.87  | 35            | 10                   | 0.01                        | 721                | 6734        | ITGB5,LTBP2,ITGA5,ITGB3,BMP4,LTBP1,ITGB1,FBLN1,MFAP3,FURIN                                                                                                                                                                                                                                                                                                                                                                                                                                                                                                                                                                                                                                                                                                                                                                                                                                                                                                                                                                                                                                                                                                                      |
| R-HSA-400253  | Circadian Clock                                               | 2.99E-03   | -5.81  | 65            | 15                   | 0.02                        | 721                | 6734        | BHLHE41,PER1,RXRA,NPAS2,KLF15,NR1P1,BHLHE40,PPARGC1A,CHD9,ARNTL,UBB,NR3C1,NR1D1,MEF2C,SREBF1                                                                                                                                                                                                                                                                                                                                                                                                                                                                                                                                                                                                                                                                                                                                                                                                                                                                                                                                                                                                                                                                                    |
| R-HSA-2129379 | Molecules associated with elastic fibres                      | 3.42E-03   | -5.68  | 25            | 8                    | 0.01                        | 721                | 6734        | FBLN1,MFAP3,LTBP1,ITGB3,BMP4,ITGB1,LTBP2,ITGB5                                                                                                                                                                                                                                                                                                                                                                                                                                                                                                                                                                                                                                                                                                                                                                                                                                                                                                                                                                                                                                                                                                                                  |
| R-HSA-190241  | FGFR2 ligand binding and activation                           | 3.50E-03   | -5.66  | 7             | 4                    | 0.01                        | 721                | 6734        | FGFR2,FGFBP3,FGF1,FGF2                                                                                                                                                                                                                                                                                                                                                                                                                                                                                                                                                                                                                                                                                                                                                                                                                                                                                                                                                                                                                                                                                                                                                          |
| R-HSA-8848021 | Signaling by PTK6                                             | 4.46E-03   | -5.41  | 55            | 13                   | 0.02                        | 721                | 6734        | SOCS3,RASA3,EGFR,NR3C1,SPRED1,UBB,BCAR1,RASAL2,KHDRBS3,DOK1,EPA S1,PTPN1,ARHGAP35                                                                                                                                                                                                                                                                                                                                                                                                                                                                                                                                                                                                                                                                                                                                                                                                                                                                                                                                                                                                                                                                                               |
| R-HSA-5218920 | VEGFR2 mediated vascular permeability                         | 4.48E-03   | -5.41  | 26            | 8                    | 0.01                        | 721                | 6734        | CAV1,VAV3,AKT3,CDH5,RICTOR,MAPKAP1,JUP,CTNNB1                                                                                                                                                                                                                                                                                                                                                                                                                                                                                                                                                                                                                                                                                                                                                                                                                                                                                                                                                                                                                                                                                                                                   |
| R-HSA-190375  | FGFR2c ligand binding and activation                          | 4.50E-03   | -5.40  | 4             | 3                    | 0.00                        | 721                | 6734        | FGF1,FGF2,FGFR2                                                                                                                                                                                                                                                                                                                                                                                                                                                                                                                                                                                                                                                                                                                                                                                                                                                                                                                                                                                                                                                                                                                                                                 |
| R-HSA-3781865 | Diseases of glycosylation                                     | 5.01E-03   | -5.30  | 62            | 14                   | 0.02                        | 721                | 6734        | ADAMTS6,THSD4,ACAN,ADAMTSL3,ADAMTS9,ADAMTS5,PRELP,NOTCH2,THBS1,HSPG2,LUM,GPC6,VCAN,ADAMTS3                                                                                                                                                                                                                                                                                                                                                                                                                                                                                                                                                                                                                                                                                                                                                                                                                                                                                                                                                                                                                                                                                      |
| R-HSA-381340  | Transcriptional regulation of white adipocyte differentiation | 5.07E-03   | -5.28  | 75            | 16                   | 0.02                        | 721                | 6734        | SREBF1,KLF4,MED30,MED27,CHD9,RXRA,CD36,NFKB1,MED4,MED15,MED9,EBF1,PPARGC1A,MED26,THRAP3,EGR2                                                                                                                                                                                                                                                                                                                                                                                                                                                                                                                                                                                                                                                                                                                                                                                                                                                                                                                                                                                                                                                                                    |
| R-HSA-1266738 | Developmental Biology                                         | 5.77E-03   | -5.16  | 637           | 88                   | 0.12                        | 721                | 6734        | ABL1,EGR2,EPAS1,PIK3CB,SH2B3,MEF2C,RARG,CACNB2,ANK2,CHD9,JAK1,KLF4,SREBF1,PPL,ITGA5,MYO10,DUSP10,HSP90AB1,PPP2R5E,PSMD9,PPARGC1A,EBF1,NCAM1,FGFR2,THRAP3,ANGPT1,VAV3,DNM3,DPYSL2,GRB10,ANK1,SEMA6D,MED15,ARRB1,MED4,NFKB1,TRIO,GFRA2,COL6A3,RAPGEF2,FOXO1,TCF12,MED30,DOK1,UBB,AKT3,EPHA3,RAP1B,ITGB3,NEK1,MYH9,ITGB1,PDGFRA,ANK3,CD36,JUP,CTNNB1,RXRA,EGFR,PLXNA4,SLIT2,ARHGEF12,EFNA5,ADAM10,CAMK2D,SPRED1,RASAL2,MED26,FGF2,PTPRC,ARHGAP35,FURIN,ARHGEF28,RASA3,LAMA1,GRIN2A,IRS1,MED9,RARB,STX1A,FGF1,RAF1,CDON,ENAH,NTN4,MED27,RHO B,NRP2                                                                                                                                                                                                                                                                                                                                                                                                                                                                                                                                                                                                                                  |

**Table S4. Pathway analysis of genes bound by FOXO1 exclusively at promoter regions**

| TermID        | Term                                                                         | Enrichment | logP  | Genes in Term | Target Genes in Term | Fraction of Targets in Term | Total Target Genes | Total Genes | Gene Symbols                                                                                                                   |
|---------------|------------------------------------------------------------------------------|------------|-------|---------------|----------------------|-----------------------------|--------------------|-------------|--------------------------------------------------------------------------------------------------------------------------------|
| R-HSA-622312  | Inflammasomes                                                                | 2.89E-03   | -5.85 | 12            | 3                    | 0.02                        | 169                | 6734        | TXNIP, NLRP1, P2RX7                                                                                                            |
|               | Cellular responses to stress                                                 | 9.57E-03   | -4.65 | 364           | 17                   | 0.10                        | 169                | 6734        | GABARAPL1, HSPA1B, ARNT, TERF2IP, GSTP1, BAG1, HSP90AA1, WIP12, SOD1, TSC1, MTMR14, MAPK7, HSPA13, CDKN2D, HSPA9, MDM2, MAP2K3 |
| R-HSA-2262752 | Interleukin-4 and 13 signaling                                               | 1.10E-02   | -4.51 | 75            | 6                    | 0.04                        | 169                | 6734        | RORA, HSP90AA1, RORC, JUNB, FOXO1, CCL2                                                                                        |
| R-HSA-381753  | Olfactory Signaling Pathway                                                  | 1.21E-02   | -4.41 | 7             | 2                    | 0.01                        | 169                | 6734        | REEP3, REEP5                                                                                                                   |
| R-HSA-198753  | ERK/MAPK targets                                                             | 1.48E-02   | -4.21 | 21            | 3                    | 0.02                        | 169                | 6734        | MAPK7, RPS6KA5, DUSP4                                                                                                          |
| R-HSA-975138  | TRAF6 mediated induction of NfκB and MAP kinases upon TLR7/8 or 9 activation | 1.57E-02   | -4.15 | 81            | 6                    | 0.04                        | 169                | 6734        | MAP2K3, MAPK7, RPS6KA5, CD14, DUSP4, HMGB1                                                                                     |
| R-HSA-2468052 | Establishment of Sister Chromatid Cohesion                                   | 1.59E-02   | -4.14 | 8             | 2                    | 0.01                        | 169                | 6734        | STAG2, RAD21                                                                                                                   |
| R-HSA-168181  | Toll Like Receptor 7/8 (TLR7/8) Cascade                                      | 1.76E-02   | -4.04 | 83            | 6                    | 0.04                        | 169                | 6734        | MAP2K3, CD14, RPS6KA5, MAPK7, HMGB1, DUSP4                                                                                     |
| R-HSA-975155  | MyD88 dependent cascade initiated on endosome                                | 1.76E-02   | -4.04 | 83            | 6                    | 0.04                        | 169                | 6734        | DUSP4, HMGB1, CD14, MAPK7, RPS6KA5, MAP2K3                                                                                     |
| R-HSA-166058  | MyD88:Mal cascade initiated on plasma membrane                               | 1.95E-02   | -3.94 | 85            | 6                    | 0.04                        | 169                | 6734        | DUSP4, HMGB1, MAPK7, RPS6KA5, CD14, MAP2K3                                                                                     |
| R-HSA-181438  | Toll Like Receptor 2 (TLR2) Cascade                                          | 1.95E-02   | -3.94 | 85            | 6                    | 0.04                        | 169                | 6734        | MAPK7, RPS6KA5, CD14, MAP2K3, HMGB1, DUSP4                                                                                     |
| R-HSA-168179  | Toll Like Receptor TLR1:TLR2 Cascade                                         | 1.95E-02   | -3.94 | 85            | 6                    | 0.04                        | 169                | 6734        | DUSP4, HMGB1, MAP2K3, RPS6KA5, MAPK7, CD14                                                                                     |
| R-HSA-168188  | Toll Like Receptor TLR6:TLR2 Cascade                                         | 1.95E-02   | -3.94 | 85            | 6                    | 0.04                        | 169                | 6734        | MAP2K3, MAPK7, CD14, RPS6KA5, HMGB1, DUSP4                                                                                     |
| R-HSA-844456  | The NLRP3 inflammasome                                                       | 2.01E-02   | -3.91 | 9             | 2                    | 0.01                        | 169                | 6734        | TXNIP, P2RX7                                                                                                                   |
| R-HSA-2470946 | Cohesin Loading onto Chromatin                                               | 2.01E-02   | -3.91 | 9             | 2                    | 0.01                        | 169                | 6734        | STAG2, RAD21                                                                                                                   |
| R-HSA-425393  | Transport of inorganic cations/anions and amino acids/oligopeptides          | 2.04E-02   | -3.89 | 63            | 5                    | 0.03                        | 169                | 6734        | SLC38A2, CALM2, SLC12A6, SLC7A11, SLC4A2                                                                                       |
| R-HSA-168138  | Toll Like Receptor 9 (TLR9) Cascade                                          | 2.06E-02   | -3.88 | 86            | 6                    | 0.04                        | 169                | 6734        | HMGB1, DUSP4, CD14, RPS6KA5, MAPK7, MAP2K3                                                                                     |
| R-HSA-198725  | Nuclear Events (kinase and transcription factor activation)                  | 2.13E-02   | -3.85 | 24            | 3                    | 0.02                        | 169                | 6734        | RPS6KA5, MAPK7, DUSP4                                                                                                          |
| R-HSA-5674400 | Constitutive Signaling by AKT1 E17K in Cancer                                | 2.38E-02   | -3.74 | 25            | 3                    | 0.02                        | 169                | 6734        | GSK3A, MDM2, FOXO1                                                                                                             |
| R-HSA-381042  | PERK regulates gene expression                                               | 2.64E-02   | -3.63 | 26            | 3                    | 0.02                        | 169                | 6734        | EIF2AK3, EXOSC2, CCL2                                                                                                          |

**Table S5. Pathway analysis of the 147 FOXO1 putative genes shared by all 4 cell types**

| TermID        | Term                                                 | Enrichment | logP  | Genes in Term | Target Genes in Term | Fraction of Targets in Term | Total Target Genes | Total Genes | Gene Symbols                                                                                              |
|---------------|------------------------------------------------------|------------|-------|---------------|----------------------|-----------------------------|--------------------|-------------|-----------------------------------------------------------------------------------------------------------|
| R-HSA-450282  | MAPK targets/ Nuclear events mediated by MAP kinases | 5.75E-05   | -9.76 | 31            | 4                    | 0.06                        | 72                 | 10411       | FOS, MEF2A, DUSP4, DUSP6                                                                                  |
| R-HSA-166520  | Signalling by NGF                                    | 9.69E-05   | -9.24 | 479           | 12                   | 0.17                        | 72                 | 10411       | DUSP4, DUSP6, TNRC6B, RAPGEF1, FGD4, PIK3CB, MEF2A, PTK2, RALGDS, VAV3, PIK3R1, JAK1                      |
| R-HSA-2454202 | Fc epsilon receptor (FCER1) signaling                | 2.54E-04   | -8.28 | 378           | 10                   | 0.14                        | 72                 | 10411       | DUSP6, TNRC6B, DUSP4, NFATC1, PIK3CB, PTK2, FOS, JAK1, VAV3, PIK3R1                                       |
| R-HSA-187037  | NGF signalling via TRKA from the plasma membrane     | 3.07E-04   | -8.09 | 387           | 10                   | 0.14                        | 72                 | 10411       | PTK2, PIK3R1, RALGDS, JAK1, DUSP4, TNRC6B, DUSP6, PIK3CB, RAPGEF1, MEF2A                                  |
| R-HSA-2029480 | Fcgamma receptor (FCGR) dependent phagocytosis       | 4.91E-04   | -7.62 | 95            | 5                    | 0.07                        | 72                 | 10411       | PTK2, MYH9, VAV3, PIK3R1, PIK3CB                                                                          |
| R-HSA-114604  | GPVI-mediated activation cascade                     | 5.12E-04   | -7.58 | 54            | 4                    | 0.06                        | 72                 | 10411       | VAV3, PIK3R1, PIK3CB, JAK1                                                                                |
| R-HSA-450294  | MAP kinase activation in TLR cascade                 | 9.77E-04   | -6.93 | 64            | 4                    | 0.06                        | 72                 | 10411       | DUSP6, DUSP4, FOS, MEF2A                                                                                  |
| R-HSA-6806834 | Signaling by MET                                     | 1.30E-03   | -6.65 | 69            | 4                    | 0.06                        | 72                 | 10411       | PTK2, PTPN1, PIK3R1, RAPGEF1                                                                              |
| R-HSA-166016  | Toll Like Receptor 4 (TLR4) Cascade                  | 1.76E-03   | -6.34 | 126           | 5                    | 0.07                        | 72                 | 10411       | DUSP4, DUSP6, MEF2A, FOS, CD180                                                                           |
| R-HSA-1266738 | Developmental Biology                                | 2.40E-03   | -6.03 | 1078          | 16                   | 0.22                        | 72                 | 10411       | DUSP6, DUSP4, EBF1, MEF2A, SMAD3, PIK3CB, FOXP1, PTK2, RBPJ, DPYSL2, VAV3, PIK3R1, ANK3, MED9, JAK1, MYH9 |

**Table S6. Pathway analysis using KeggDB of the 428 genes bound by FOXO1 and DE in OA**

| TermID     | Term                                                   | Enrichment | logP  | Genes in Term | Target Genes in Term | Fraction of Targets in Term | Total Target Genes | Total Genes | Gene Symbols                                                                                                                                |
|------------|--------------------------------------------------------|------------|-------|---------------|----------------------|-----------------------------|--------------------|-------------|---------------------------------------------------------------------------------------------------------------------------------------------|
| hsa04710   | Circadian rhythm                                       | 6.65E-04   | -7.32 | 12            | 7                    | 0.04                        | 178                | 1174        | NR1D1, BHLHE40, RORC, NPAS2, PER1, ARNTL, BHLHE41                                                                                           |
| hsa04974   | Protein digestion and absorption                       | 8.15E-04   | -7.11 | 19            | 9                    | 0.05                        | 178                | 1174        | COL3A1, COL13A1, COL5A2, COL6A3, COL1A2, COL15A1, COL2A1, MME, DPP4                                                                         |
| ko04512    | ECM-receptor interaction                               | 1.42E-03   | -6.55 | 24            | 10                   | 0.06                        | 178                | 1174        | ITGB5, ITGB3, ITGB8, THBS2, TNC, ITGB4, COL1A2, SPP1, COL6A3, COL2A1                                                                        |
| ko05224    | Breast cancer                                          | 4.55E-03   | -5.39 | 36            | 12                   | 0.07                        | 178                | 1174        | FZD8, FZD10, MYC, WNT11, CCND1, FOS, WNT5A, FGF1, CDK6, CDKN1A, HES1, FZD5                                                                  |
| hsa_M00677 | Wnt signaling                                          | 5.70E-03   | -5.17 | 9             | 5                    | 0.03                        | 178                | 1174        | WNT11, FZD10, FZD8, WNT5A, FZD5                                                                                                             |
| ko05219    | Bladder cancer                                         | 7.60E-03   | -4.88 | 13            | 6                    | 0.03                        | 178                | 1174        | CCND1, CDKN1A, MMP2, MYC, DAPK2, RPS6KA5                                                                                                    |
| ko05166    | HTLV-I infection                                       | 9.03E-03   | -4.71 | 58            | 16                   | 0.09                        | 178                | 1174        | ATF3, FOS, WNT11, FZD10, FZD8, TLN2, ADCY1, ZFP36, VCAM1, CDKN2B, WNT5A, CCND1, MYC, CDKN1A, FZD5, ETS2                                     |
| ko04151    | PI3K-Akt signaling pathway                             | 1.50E-02   | -4.20 | 87            | 21                   | 0.12                        | 178                | 1174        | CCND1, TNC, MYC, NR4A1, PDGFC, THBS2, ITGB8, CDKN1A, COL1A2, CDK6, IL6R, NGF, SPP1, ITGB5, ITGB3, SGK1, COL2A1, CDKN1B, ITGB4, COL6A3, FGF1 |
| hsa05412   | Arrhythmogenic right ventricular cardiomyopathy (ARVC) | 1.64E-02   | -4.11 | 19            | 7                    | 0.04                        | 178                | 1174        | ITGB5, ITGB4, CDH2, JUP, ITGB8, ITGB3, SGCD                                                                                                 |
| hsa04115   | p53 signaling pathway                                  | 1.64E-02   | -4.11 | 19            | 7                    | 0.04                        | 178                | 1174        | CDKN1A, CDK1, CCND1, GADD45A, GADD45B, IGFBP3, CDK6                                                                                         |
| ko04110    | Cell cycle                                             | 1.66E-02   | -4.10 | 37            | 11                   | 0.06                        | 178                | 1174        | WEE1, MYC, CDK1, CCND1, CDKN2B, CDK6, CDKN1A, GADD45A, BUB1, GADD45B, CDKN1B                                                                |
| ko05217    | Basal cell carcinoma                                   | 1.70E-02   | -4.07 | 15            | 6                    | 0.03                        | 178                | 1174        | FZD10, FZD8, WNT11, GLI3, FZD5, WNT5A                                                                                                       |
| hsa04068   | FoxO signaling pathway                                 | 1.78E-02   | -4.03 | 47            | 13                   | 0.07                        | 178                | 1174        | SGK1, S1PR1, BCL6, CCND1, CDKN2B, BNIP3, IRS2, GADD45B, CDKN1B, FBXO32, KLF2, CDKN1A, GADD45A                                               |
| hsa00330   | Arginine and proline metabolism                        | 2.17E-02   | -3.83 | 8             | 4                    | 0.02                        | 178                | 1174        | ALDH2, ALDH1B1, P4HA3, ALDH3A2                                                                                                              |
| ko00410    | beta-Alanine metabolism                                | 2.17E-02   | -3.83 | 8             | 4                    | 0.02                        | 178                | 1174        | AOC3, ALDH2, ALDH3A2, ALDH1B1                                                                                                               |
| hsa00561   | Glycerolipid metabolism                                | 2.43E-02   | -3.72 | 12            | 5                    | 0.03                        | 178                | 1174        | LCLAT1, ALDH2, ALDH1B1, DGKI, ALDH3A2                                                                                                       |
| hsa00053   | Ascorbate and aldarate metabolism                      | 2.71E-02   | -3.61 | 5             | 3                    | 0.02                        | 178                | 1174        | ALDH2, ALDH1B1, ALDH3A2                                                                                                                     |
| ko00620    | Pyruvate metabolism                                    | 3.46E-02   | -3.36 | 9             | 4                    | 0.02                        | 178                | 1174        | ALDH2, ACSS1, ALDH1B1, ALDH3A2                                                                                                              |
| hsa04713   | Circadian entrainment                                  | 4.26E-02   | -3.16 | 18            | 6                    | 0.03                        | 178                | 1174        | NOS1AP, FOS, PER1, GRIN2A, RPS6KA5, ADCY1                                                                                                   |
| hsa05205   | Proteoglycans in cancer                                | 4.82E-02   | -3.03 | 64            | 15                   | 0.08                        | 178                | 1174        | ITGB3, ITGB5, WNT11, MYC, FZD8, FZD10, TFAP4, CCND1, WNT5A, LUM, ANK3, FZD5, MMP2, TIMP3, CDKN1A                                            |
