# Supplementary material
Source: PubMed Central journal article supplement (PMC7813518)
Supplement: NIHMS1591020-supplement-sup_02.pdf [file NIHMS1591020-supplement-sup_02.pdf]

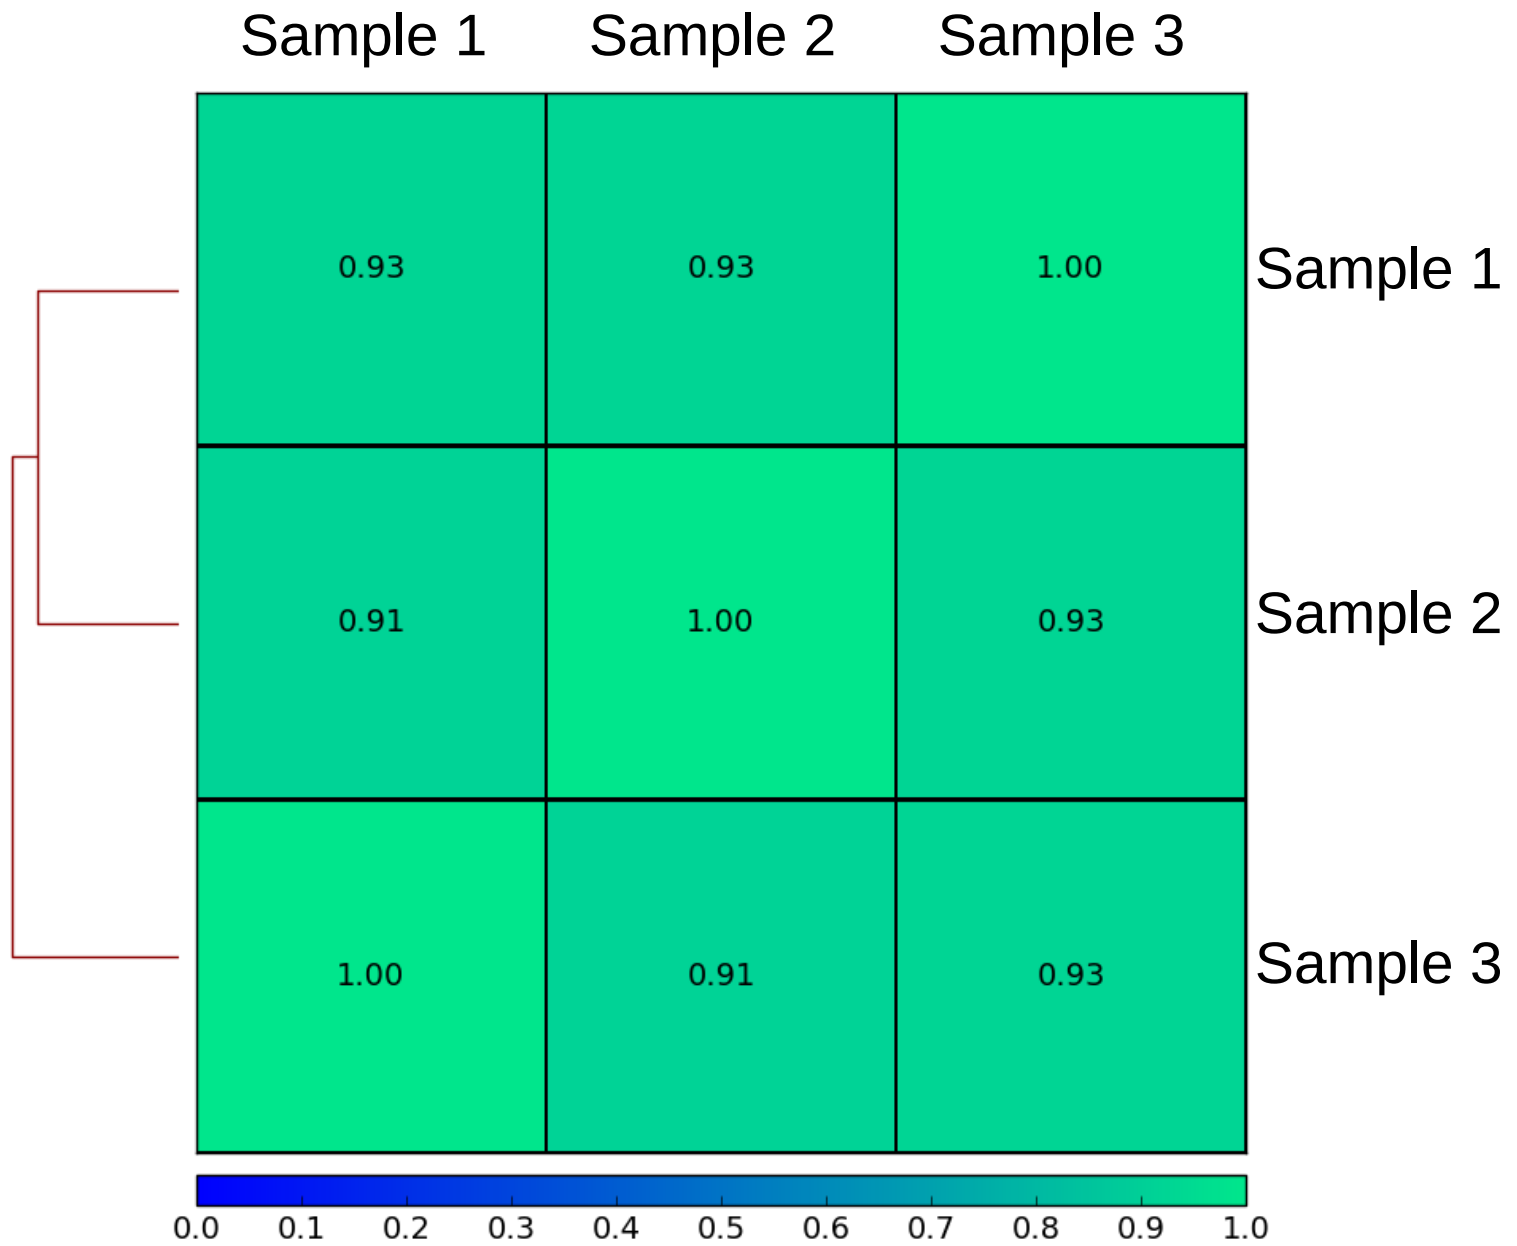

**Suppl Figure S1.** Heatmap of Pearson's correlation between FOXO1 ChIP-seq replicates from human primary chondrocytes.

| Rank | Motif | P-value | log P-value | % of Targets | % of Background | STD(Bg STD)     | Best Match/Details                                                                                                                        |
|------|-------|---------|-------------|--------------|-----------------|-----------------|-------------------------------------------------------------------------------------------------------------------------------------------|
| 1    |       | 1e-230  | -5.304e+02  | 36.04%       | 4.92%           | 51.3bp (64.9bp) | JunB(bZIP)/DendriticCells-Junb-ChIP-Seq(GSE36099)/Homer(0.989)<br><a href="#">More Information</a>   <a href="#">Similar Motifs Found</a> |
| 2    |       | 1e-146  | -3.378e+02  | 50.75%       | 17.15%          | 46.6bp (68.7bp) | PB0120.1_Foxj1_2/Jaspar(0.771)<br><a href="#">More Information</a>   <a href="#">Similar Motifs Found</a>                                 |
| 3    |       | 1e-41   | -9.507e+01  | 15.95%       | 5.05%           | 47.2bp (58.9bp) | FOX2/MA0847.1/Jaspar(0.838)<br><a href="#">More Information</a>   <a href="#">Similar Motifs Found</a>                                    |
| 4    |       | 1e-33   | -7.661e+01  | 36.21%       | 20.58%          | 55.8bp (64.6bp) | CEBP:AP1(bZIP)/ThioMac-CEBPb-ChIP-Seq(GSE21512)/Homer(0.9)<br><a href="#">More Information</a>   <a href="#">Similar Motifs Found</a>     |
| 5    |       | 1e-33   | -7.631e+01  | 61.85%       | 43.95%          | 54.9bp (63.3bp) | MF0001.1_ETS_class/Jaspar(0.920)<br><a href="#">More Information</a>   <a href="#">Similar Motifs Found</a>                               |
| 6    |       | 1e-22   | -5.273e+01  | 12.25%       | 4.76%           | 54.2bp (63.4bp) | NFIC/MA0161.2/Jaspar(0.801)<br><a href="#">More Information</a>   <a href="#">Similar Motifs Found</a>                                    |

**Suppl Figure S2. *de novo* motif discovery at FOXO1 peaks without a canonical FOXO1 binding motif.**

Fifty percent of the peaks without a canonical FOXO1 binding motif have a truncated FOXO1 binding motif (motif 2).

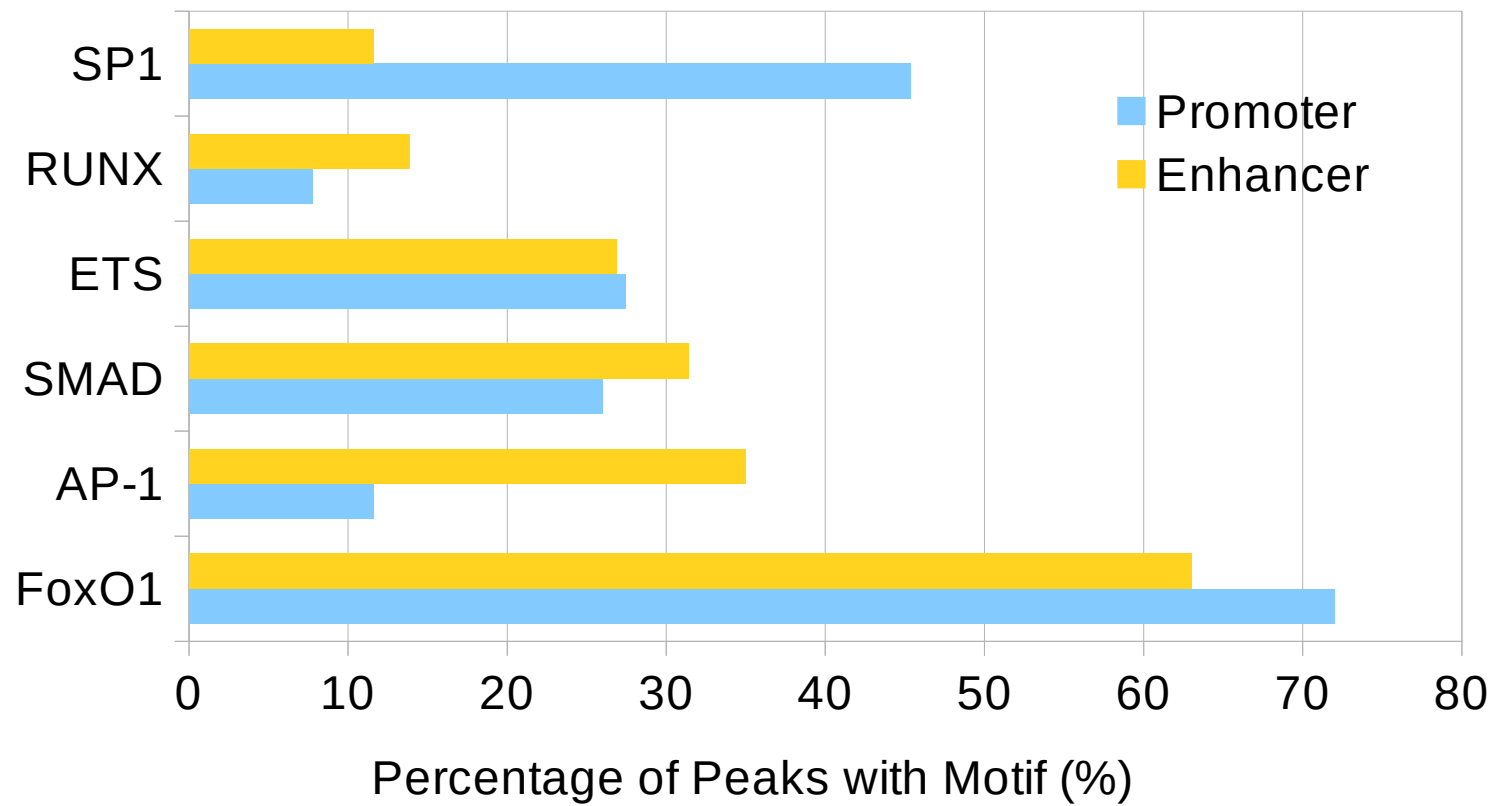

**Suppl Figure S3. Distinct motif enrichment at FOXO1 occupied promoters and enhancers.**

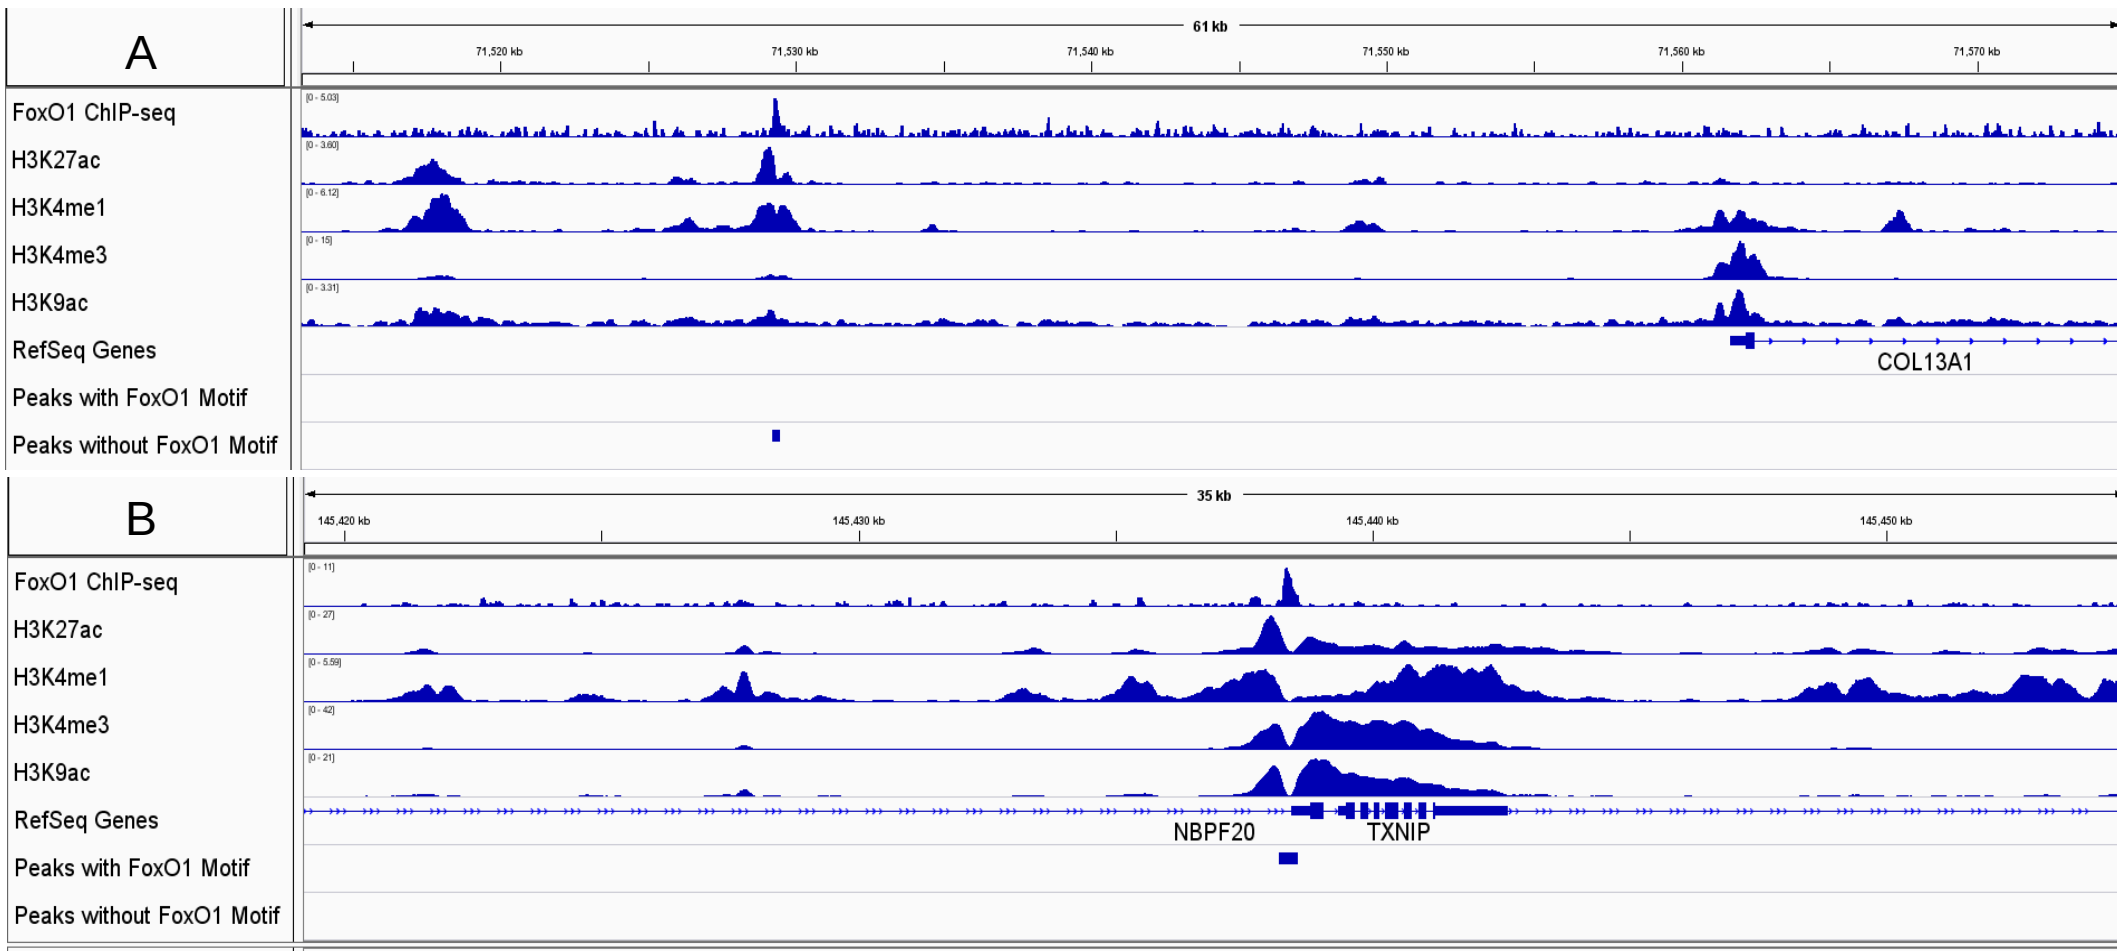

**Suppl Figure S4. FOXO1 regulates distinct transcriptional programs at the promoter and enhancer levels.**

A) Chondrocyte-specific ACAN is regulated at the enhancer level with a combination of peaks with and without FOXO1 canonical binding motif.

B) Ubiquitous TXNIP is regulated at the promoter level with a FOXO1 binding motif.

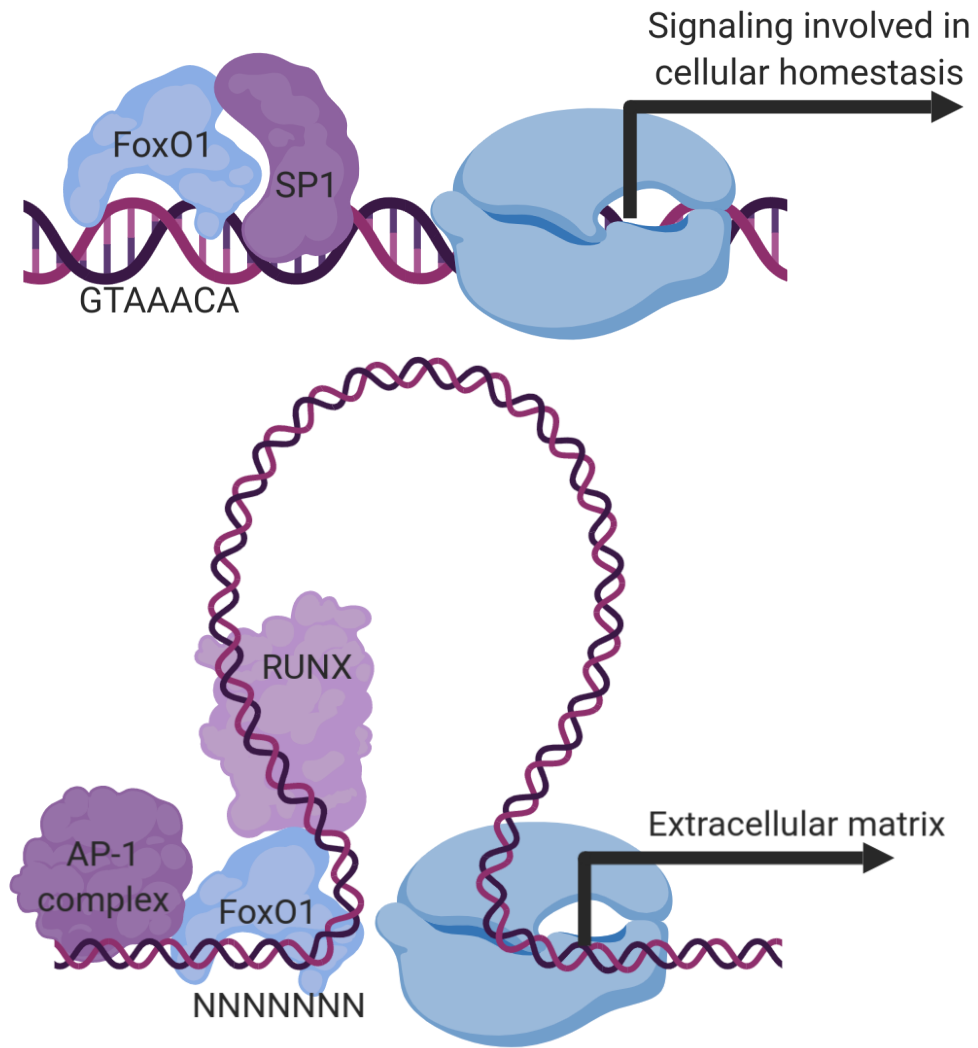

**Suppl Figure S5. Schematic for distinct mechanisms by which FOXO1 regulates tissue specific and ubiquitous target genes.**
